# Supplementary material for: Rosiglitazone promotes development of a novel adipocyte population from bone marrow–derived circulating progenitor cells
Source: JCI journal article supplement (doi:10.1172/jci28510), 2006-12-01
Supplement: sd1 [file 1]

**Supplementary Table 1. Affect of ROSI and High Fat Diet on Cell Surface Marker Expression on PBMC, and Omental and Dorsal Intrascapular Fat Stromal/Vascular Populations.**

|              |               | <b>PBMC</b>    |                 |                 |               |                 |
|--------------|---------------|----------------|-----------------|-----------------|---------------|-----------------|
|              |               | <b>Week 1</b>  |                 | <b>Week 3</b>   | <b>Week 7</b> |                 |
|              |               | <b>ROSI</b>    | <b>High Fat</b> | <b>High Fat</b> | <b>ROSI</b>   | <b>High Fat</b> |
| <b>CD45+</b> | <b>Sca-1+</b> | 1.00           | 1.17            | 1.08            | 1.08          | 1.06            |
| "            | <b>c-Kit+</b> | 1.06           | 0.85            | 1.27            | 1.33          | 1.05            |
| "            | <b>CD34+</b>  | 0.87           | 0.72            | 1.83            | 0.95          | 0.55            |
| "            | <b>CD11b+</b> | 1.10           | 0.82            | 0.76            | 1.18          | 0.76            |
| "            | <b>CD14+</b>  | 0.97           | 0.82            | 1.67            | 2.63          | 1.19            |
| "            | <b>Gr-1+</b>  | 0.87           | 0.84            | 1.01            | 1.62          | 0.72            |
| "            | <b>Thy-1+</b> | 1.00           | 0.90            | 1.26            | 1.25          | 1.06            |
| "            | <b>B220+</b>  | 0.87           | 1.16            | 0.97            | 1.03          | 0.76            |
| <b>CD45-</b> | <b>Sca-1+</b> | 0.89           | 1.50            | 0.57            | 18.88         | 1.88            |
|              |               | <b>Omental</b> |                 |                 |               |                 |
|              |               | <b>Week 1</b>  |                 | <b>Week 3</b>   | <b>Week 7</b> |                 |
|              |               | <b>ROSI</b>    | <b>High Fat</b> | <b>High Fat</b> | <b>ROSI</b>   | <b>High Fat</b> |
| <b>CD45+</b> | <b>Sca-1+</b> | 0.84           | 1.20            | 0.91            | 1.06          | 1.17            |
| "            | <b>c-Kit+</b> | 0.79           | 1.29            | 0.96            | 0.83          | 1.03            |
| "            | <b>CD34+</b>  | 0.89           | 1.22            | 1.56            | 0.80          | 1.08            |
| "            | <b>CD11b+</b> | 1.10           | 1.10            | 0.92            | 0.83          | 0.90            |
| "            | <b>CD14+</b>  | 1.14           | 0.75            | 1.58            | 0.95          | 1.04            |
| "            | <b>Gr-1+</b>  | 0.78           | 1.04            | 1.25            | 1.03          | 1.07            |
| "            | <b>Thy-1+</b> | 0.96           | 1.07            | 1.12            | 1.05          | 1.13            |
| "            | <b>B220+</b>  | 0.74           | 1.04            | 0.97            | 0.83          | 1.04            |
| <b>CD45-</b> | <b>Sca-1+</b> | 0.60           | 1.00            | 1.02            | 0.60          | 2.11            |
|              |               | <b>Dorsal</b>  |                 |                 |               |                 |
|              |               | <b>Week 1</b>  |                 | <b>Week 3</b>   | <b>Week 7</b> |                 |
|              |               | <b>ROSI</b>    | <b>High Fat</b> | <b>High Fat</b> | <b>ROSI</b>   | <b>High Fat</b> |
| <b>CD45+</b> | <b>Sca-1+</b> | 0.94           | 1.15            | 1.12            | 0.93          | 1.00            |
| "            | <b>c-Kit+</b> | 0.94           | 0.94            | 1.16            | 1.45          | 1.19            |
| "            | <b>CD34+</b>  | 0.80           | 1.40            | 1.93            | 1.46          | 1.29            |
| "            | <b>CD11b+</b> | 1.00           | 0.92            | 1.13            | 1.06          | 1.02            |
| "            | <b>CD14+</b>  | 0.82           | 0.73            | 1.00            | 1.85          | 1.45            |
| "            | <b>Gr-1+</b>  | 0.69           | 0.94            | 1.00            | 1.17          | 1.11            |
| "            | <b>Thy-1+</b> | 1.00           | 0.94            | 1.42            | 1.16          | 1.29            |
| "            | <b>B220+</b>  | 1.04           | 1.25            | 1.28            | 1.07          | 0.96            |
| <b>CD45-</b> | <b>Sca-1+</b> | 0.69           | 0.61            | 0.59            | 0.68          | 0.98            |

PBMC and stromal/vascular cells from omental and intrascapular fat depots were pooled from 3 animals, labeled with the cell surface marker antibodies indicated, and subjected to flow cytometric analysis. Numbers indicate fold change in GFP+ cells expressing the cell surface markers indicated from ROSI-treated or high fat fed animals relative to levels measured in samples from untreated animals.

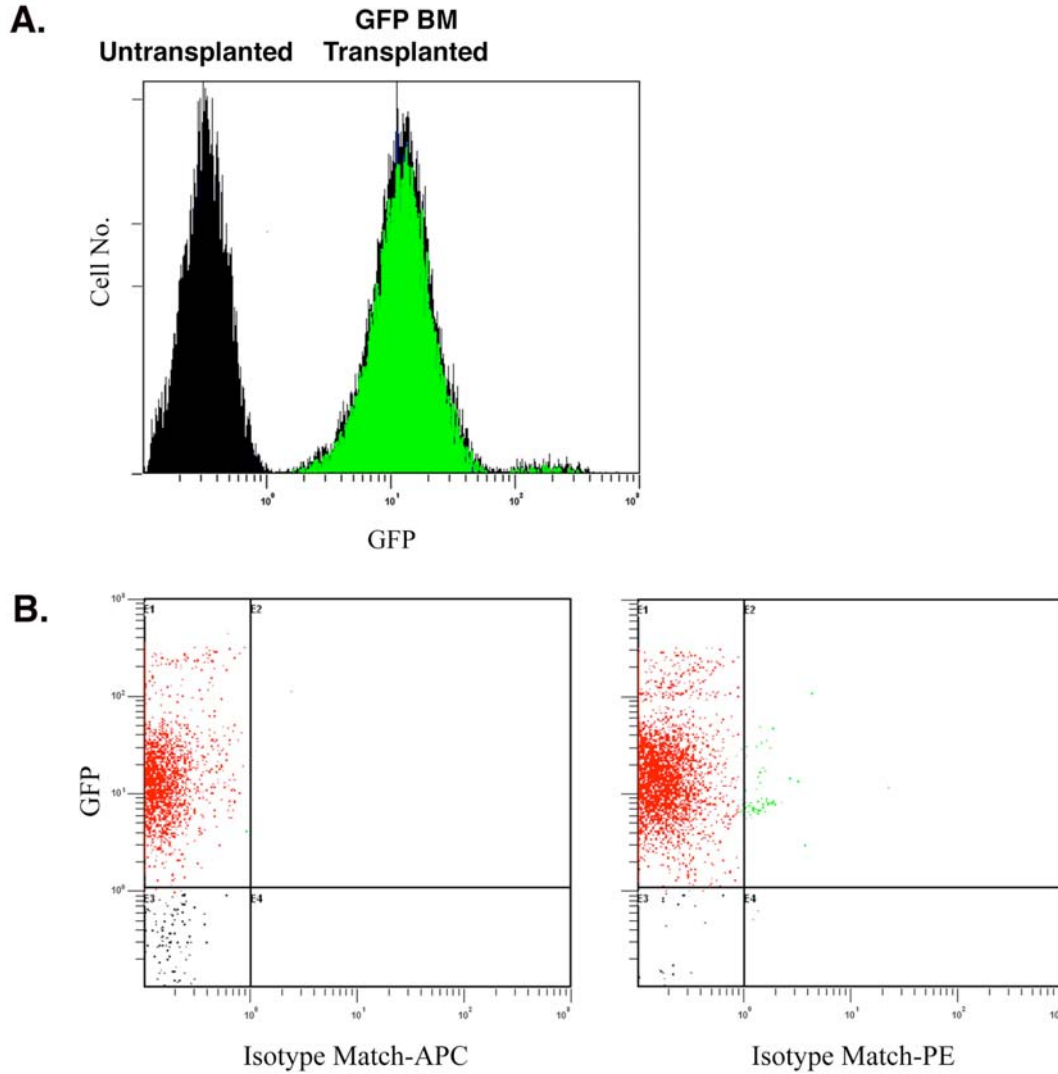

**Supplementary Figure 1. Engraftment of GFP + bone marrow into irradiated mice, and FACS analysis of isotype-matched negative control antibodies.** A) Female C57BL6 mice were irradiated, and transplanted with GFP+ BM cells from UBI-GFP transgenic mice as described in Materials and Methods. Eight weeks post-transplantation, PBMC were recovered from non-transplanted mice (black) or GFP+ BM-transplanted mice (green) and subjected to flow cytometric analysis for GFP expressing cells. Figure shows overlaid representative histograms indicating over 95% engraftment of GFP+ cells in the recipient animals. B) FACS analysis of PBMCs from GFP BM-transplanted mice with isotype matched negative control antibodies conjugated to APC or PE.

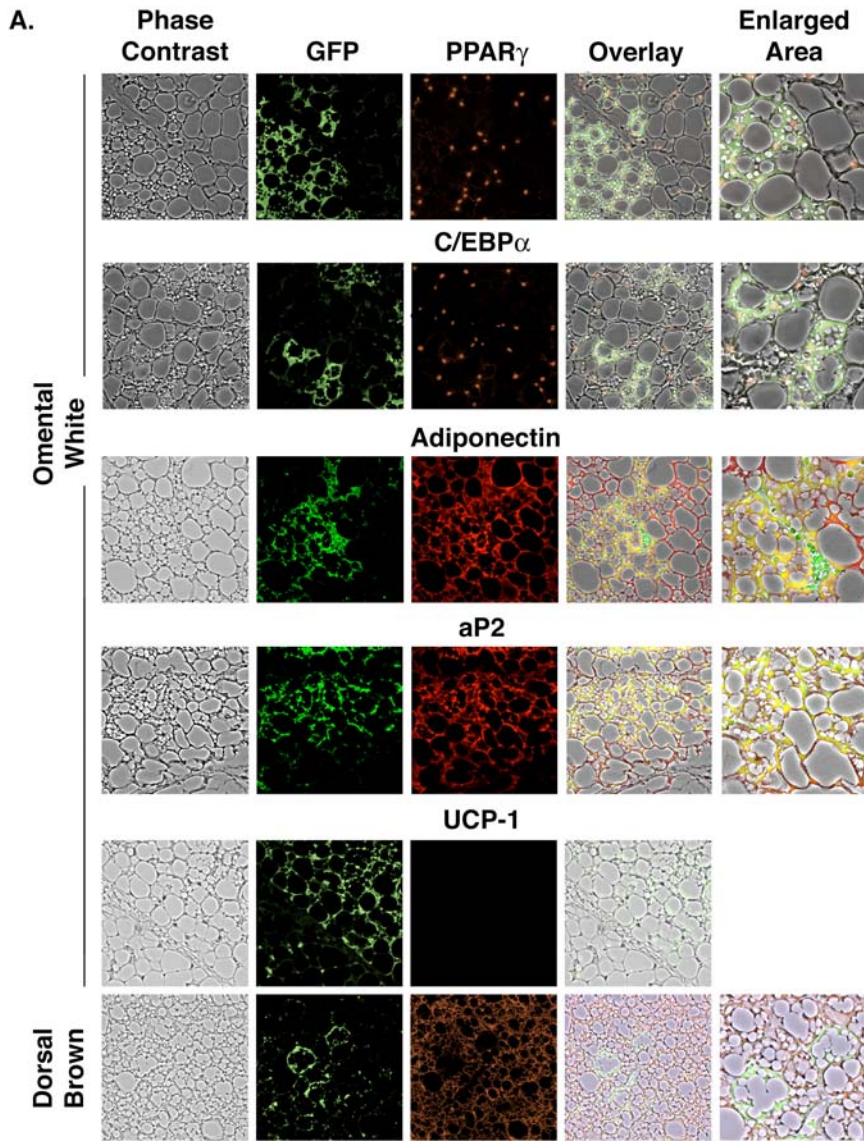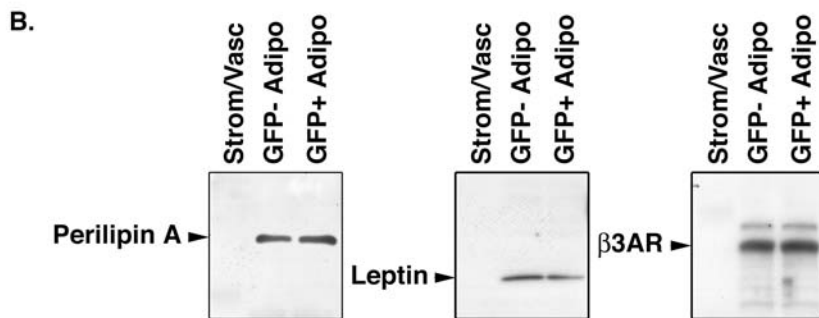

**Supplemental Figure 2. GFP+ multilocular adipocytes express C/EBP $\alpha$ , PPAR $\gamma$ , adiponectin, aP2, perilipin, leptin, and  $\beta$ 3AR. A) Immunohistochemical staining for C/EBP $\alpha$ ,**

PPAR $\gamma$ , adiponectin, aP2, and UCP-1 was conducted as described in Materials and Methods on 5  $\mu$ m sections of paraformaldehyde-fixed omental white or dorsal brown adipose tissue from GFP BM-transplanted mice fed rosiglitazone impregnated diet for 7 weeks. Figure shows representative phase contrast, or fluorescent digital deconvolution photomicrographs. Overlay images show a digital overlay of the phase contrast and fluorescent images. Red bar = 100  $\mu$ m.

B) Western blot analysis for perilipin A, leptin and  $\beta$ 3AR were performed on whole cell lysates prepared from stromal/vascular (Strom/Vasc), GFP- and GFP+ adipocytes isolated from ROSI-treated animals. GFP- and + cells were separated by FACS.
